# Supplementary material for: Association of Hearing Impairment and 24-Hour Total Movement Activity in a Representative Sample of US Adults
Source: PubMed Central journal article supplement (PMC8933734; doi:10.1001/jamanetworkopen.2022.2983), 2022-03-18
Supplement: jamanetwopen-e222983-s001.pdf [file jamanetwopen-e222983-s001.pdf]

## Supplemental Online Content

Martinez-Amezcuca P, Dooley EE, Reed NS, et al. Association of hearing impairment and 24-hour total movement activity in a representative sample of US adults. *JAMA Netw Open*. 2022;5(3):e222983. doi:10.1001/jamanetworkopen.2022.2983

**eFigure.** Sensitivity Analyses: Linear Spline Terms With Knots at Different Positions and Cubic Terms

This supplemental material has been provided by the authors to give readers additional information about their work.

**eFigure. Sensitivity Analyses: Linear Spline Terms With Knots at Different Positions and Cubic Terms**

**A. Knot at 20 dB HL**

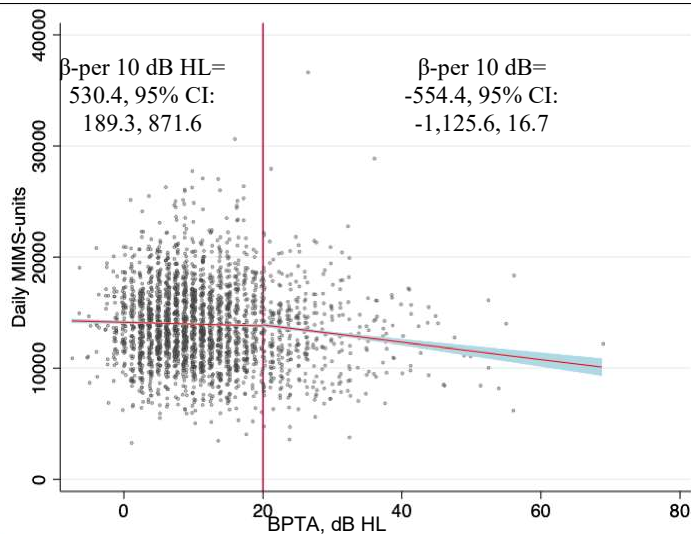

Adjusted for covariates in model 2: age, sex, race/ethnicity, education, marital status, BMI, diabetes, hypertension, smoking status, and stroke, heart attack, and heart failure.  $\beta$ -coefficients estimated with multivariable-adjusted linear regression adding a linear spline with the knot at 20 dB HL. Abbreviations: MIMS-units=Monitor-independent movement summary units (higher MIMS-units= more movement); dB HL= decibels hearing level

**B. Knot at 25 dB HL**

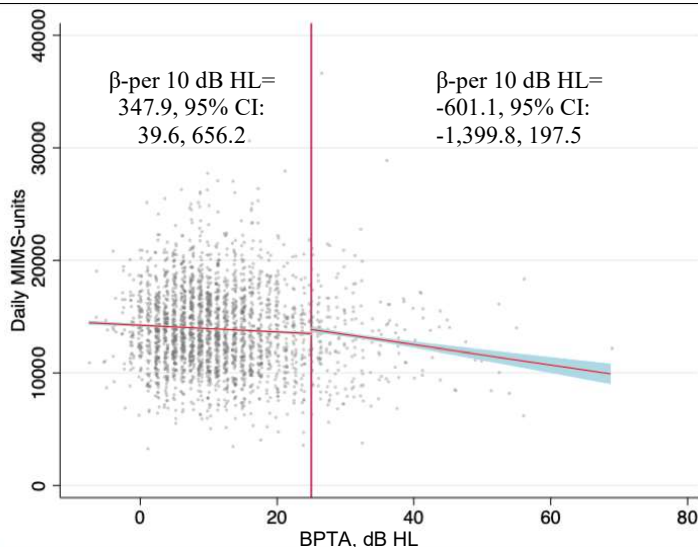

Adjusted for covariates in model 2: age, sex, race/ethnicity, education, marital status, BMI, diabetes, hypertension, smoking status, and stroke, heart attack, and heart failure.  $\beta$ -coefficients estimated with multivariable-adjusted linear regression adding a linear spline with the knot at 25 dB HL. Abbreviations: MIMS-units=Monitor-independent movement summary units (higher MIMS-units= more movement); dB HL= decibels hearing level

**C. Cubic terms, 5 knots**

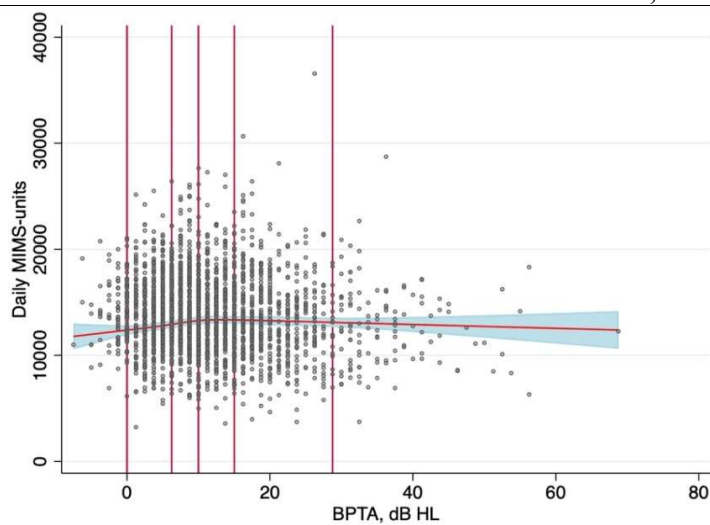

Adjusted for covariates in model 2: age, sex, race/ethnicity, education, marital status, BMI, diabetes, hypertension, smoking status, and stroke, heart attack, and heart failure.  $\beta$ -coefficients estimated with multivariable-adjusted linear regression adding splines with cubic terms with 5 knots, the positions were determined by Harrell's default percentiles. Abbreviations: MIMS-units=Monitor-independent movement summary units (higher MIMS-units= more movement); dB HL= decibels hearing level
